# Supplementary material for: Caveolin-1 promotes radioresistance via IRGM-regulated autophagy in lung cancer
Source: PubMed Central journal article supplement — Ann Transl Med. 2021 Jan;9(1):47. doi: 10.21037/atm-20-3293 (PMC7859752; doi:10.21037/atm-20-3293), 2021-01
Supplement: atm-09-01-47-dss.pdf [file atm-09-01-47-dss.pdf]

## Data Sharing Statement

|                     |                                                                                                                                                    |                                                                                                                  |
|---------------------|----------------------------------------------------------------------------------------------------------------------------------------------------|------------------------------------------------------------------------------------------------------------------|
| <b>Article Info</b> | http://dx.doi.org/10.21037/atm-20-3293                                                                                                             |                                                                                                                  |
| <b>Item</b>         | <b>Question</b>                                                                                                                                    | <b>Authors' Response<br/>(place "-" if not applicable)</b>                                                       |
| 1                   | Would you like to share data collected for your study to others?                                                                                   | Yes                                                                                                              |
| 2                   | If not, would you like to share the reason for your decision?                                                                                      |                                                                                                                  |
| 3                   | What data in particular will be shared?                                                                                                            | No                                                                                                               |
| 4                   | Any other documents will be share? Such as study protocol, statistical analysis plan, informed consent form, clinical study report, analytic code. | study protocol and statistical analysis plan                                                                     |
| 5                   | When will data availability begin?                                                                                                                 | From the publication date.                                                                                       |
| 6                   | When will data availability end?                                                                                                                   | Two years within the publication date, since the technique may be updated over time.                             |
| 7                   | To whom will you share the data?                                                                                                                   | Researchers who are interested in studies of Caveolin-1                                                          |
| 8                   | For what type of analysis or purpose?                                                                                                              | For analysis to explore the biological functions of Caveolin-1                                                   |
| 9                   | How or where can the data/documents be obtained?                                                                                                   | Emails could be sent to the address below to obtain the shared data: xzj1322007@csu.edu.cn                       |
| 10                  | Any other restrictions?                                                                                                                            | We may balance the potential benefits and risks for each request and then provide the data that could be shared. |
