# Supplementary material for: Caveolin-1 promotes radioresistance via IRGM-regulated autophagy in lung cancer
Source: PubMed Central journal article supplement — Ann Transl Med. 2021 Jan;9(1):47. doi: 10.21037/atm-20-3293 (PMC7859752; doi:10.21037/atm-20-3293), 2021-01
Supplement: atm-09-01-47-supplementary.pdf [file atm-09-01-47-supplementary.pdf]

Table S1 The forward and reverse primer sequences of autophagy RT2 Profiler™ PCR Array

| Primers     | 5' to 3'                  |
|-------------|---------------------------|
| Cav1-F      | GCGACCCTAAACACCTCAAC      |
| Cav1-R      | ATGCCGTCAAAACTGTGTGTC     |
| Actin-F     | CATGTACGTTGCTATCCAGGC     |
| Actin-R     | CTCCTTAATGTCACGCACGAT     |
| AKT1-F      | GTCATCGAACGCACCTCCAT      |
| AKT1-R      | AGCTTCAGGTACTCAAACCTCGT   |
| AMBRA1-F    | TGGGGAGGTTAGGATTTGGGA     |
| AMBRA1-R    | GAGCCGTAGGGTGGAAAGC       |
| APP-F       | GCCCTGCGGAATTGACAAAG      |
| APP-R       | CCATCTGCATAGTCTGTGCTG     |
| ATG10-F     | ATAAGATGCGACTGCTACAGGG    |
| ATG10-R     | CAATGCTCAGCCATGATGTGAT    |
| ATG12-F     | TAGAGCGAACACGAACCATCC     |
| ATG12-R     | CACCTGCCCCAACTCATAGAGA    |
| ATG16L1-F   | AACGCTGTGCAGTTCAGTCC      |
| ATG16L1-R   | AGCTGCTAAGAGGTAAGATCCA    |
| ATG16L2-F   | TTAGCAGCAACTTACAACCAGG    |
| ATG16L2-R   | ACACCACGCTATTACAGTAGGA    |
| ATG3-F      | GATGGCGGATGGGTAGATACA     |
| ATG3-R      | TCTTCACATAGTCTGAGCAATC    |
| ATG4A-F     | TGCTGGTTGGGGATGTATGC      |
| ATG4A-R     | GCGTTGGTATCTTTGGGTTGT     |
| ATG4B-F     | GGTGTGGACAGATGATCTTGC     |
| ATG4B-R     | CCAACTCCCATTTGCGCTATC     |
| ATG4C-F     | ACCCCAACAATTTCTCTGAAGG    |
| ATG4C-R     | GTCCATACCAATCTCCTGCTTTT   |
| ATG4D-F     | CCAGCCCACTGTGGATGTC       |
| ATG4D-R     | AAGCCCACGGTACAGCTTG       |
| ATG5-F      | AGAAGCTGTTTCGTCTGTGG      |
| ATG5-R      | AGGTGTTTCCAACATTGGCTC     |
| ATG7-F      | ATGATCCCTGTAACCTAGCCCA    |
| ATG7-R      | CACGGAAGCAAACTTCAAC       |
| ATG9A-F     | CCAGAATACATGGTGGCACT      |
| ATG9A-R     | GTCCCCAGAAAGAGGATCAGC     |
| ATG9B-F     | TGTGCTCACCGTCTACGAC       |
| ATG9B-R     | GGGAGGTAGTGCATGTGGG       |
| BAD-F       | CCCAGAGTTTGAGCCGAGTG      |
| BAD-R       | CCCATCCCTTCGTCTGCTCCT     |
| BAK1-F      | CATCAACCGACGCTATGACTC     |
| BAK1-R      | GTCAGGCCATGCTGGTAGAC      |
| BAX-F       | CCCAGAGGTTCTTTTCCGAG      |
| BAX-R       | CCAGCCCATGATGGTCTGAT      |
| BCL2L1-F    | GACTGAATCGGAGATGGAGACC    |
| BCL2L1-R    | GCAGTCAAACTCGTCGCCT       |
| BECN1-F     | ACCTCAGCCGAAGACTGAAG      |
| BECN1-R     | AACAGCGTTTGTAGTTCTGACA    |
| BID-F       | ATGGACCGTAGCATCCCTCC      |
| BID-R       | GTAGGTGCGTAGGTTCTGGT      |
| BNIP3-F     | TGAGTCTGGACGGAGTAGCTC     |
| BNIP3-R     | CCCTGTTGGTATCTTGTGGTGT    |
| CASP3-F     | GAAATGTGGAATTGATGCGTGA    |
| CASP3-R     | CTACAACGATCCCCTCTGAAAAA   |
| CASP8-F     | CCAGAGACTCCAGGAAAAGAGA    |
| CASP8-R     | GATAGAGCATGACCCTGTAGGC    |
| CDKN1B-F    | TAATTGGGGCTCCGGCTAACT     |
| CDKN1B-R    | TGCAGGTCGCTTCCTTATTC      |
| CDKN2A-F    | ATGGAGCCTTCGGCTGACT       |
| CDKN2A-R    | GTAACATTCGGTGGTTGGG       |
| CLN3-F      | GCCTCTCCCTTCGGGAAAG       |
| CLN3-R      | CCCTGTTTAATGAAATACTCGGC   |
| CTSB-F      | AGAGTTATGTTTACCAGGACCT    |
| CTSB-R      | GATGCAGATCCGGTCAGAGA      |
| CTSD-F      | ATTCAGGGCGAGTACATGATCC    |
| CTSD-R      | CGACACCTTGAGCGTGTAG       |
| CTSS-F      | TGACAACGGCTTTCCAGTACA     |
| CTSS-R      | GGCAGCACGATATTTGAGTCAT    |
| CXCR4-F     | ACGCCACCAACAGTCAGAG       |
| CXCR4-R     | AGTCGGGAATAGTCAGCAGGA     |
| DAPK1-F     | GAGTTTGTGCTCCTGAGATAGT    |
| DAPK1-R     | GCTTAGTGTCTCCAAGAAATGGG   |
| DRAM1-F     | AGTGCTTGATTGGTGGGATG      |
| DRAM1-R     | GATGGACTGTAGGAGCGTGTA     |
| DRAM2-F     | CTGTGCTTACCCTTGGTATGGG    |
| DRAM2-R     | GCACTTACTCCACACAGATAAC    |
| EIF2AK3-F   | GGAACGAGAGCGGATTTATT      |
| EIF2AK3-R   | ACTATGTCCATTATGGCAGCTC    |
| EIF4G1-F    | CCCGAAAAGAACCCAGCAAG      |
| EIF4G1-R    | TTCCCTCGATCCTTATCAGC      |
| ESR1-F      | GAAAGGTGGGATACGAAAAGACC   |
| ESR1-R      | GCTGTTCTTCTTAGAGCGTTTGA   |
| FADD-F      | GTGGCTGACCTGGTACAAGAG     |
| FADD-R      | GGTAGATGCGTCTGAGTCCAT     |
| FAS-F       | AGATTGTGTGATGAAGGACATGG   |
| FAS-R       | TGTTGCTGGTGAAGTGTGATT     |
| GAA-F       | TGCCCTCGCAGTATATCACAG     |
| GAA-R       | GAGACCCGTAGAGGTTCCG       |
| GABARAP-F   | AGAAGAGCATCCGTTGAGAA      |
| GABARAP-R   | CCAGGTCTCCTATCCGAGCTT     |
| GABARAPL1-F | ATGAAGTTCCAGTACAAGGAGGA   |
| GABARAPL1-R | GCTTTTGGAGCCTTCTTACAAT    |
| GABARAPL2-F | AGGTCTCAGGCTCTCAGATTG     |
| GABARAPL2-R | ACAGGAAGATCGCCTTTTCAGA    |
| HDAC1-F     | CGCCCTCACAAGCCAATG        |
| HDAC1-R     | CTGCTTGTGCTACTCCGACA      |
| HDAC6-F     | ACCCAGTGTCTCTATTCTC       |
| HDAC6-R     | CCTGGTTCCAAGGCACATTGA     |
| HGS-F       | GAGACAGAAGTCCAGTACACT     |
| HGS-R       | CGTTGAGATACCGTCCGAG       |
| HSP90AA1-F  | GCTTGACCAATGACTGGGAAG     |
| HSP90AA1-R  | AGCTCCTCACAGTTATCCATGA    |
| HSPA8-F     | ACTCCAAGCTATGTCGCCTTT     |
| HSPA8-R     | TGGCATCAAAAACCTGTGTTGGT   |
| HTT-F       | GCTCTTAGGCTTACTCGTTCCT    |
| HTT-R       | TTCCCTGTCACTCCGAAGCTG     |
| IFNG-F      | TCGGTAACTGACTTGAATGTCCA   |
| IFNG-R      | TCGCTTCCCTGTTTTAGCTGC     |
| IGF1-F      | GCTCTCAGTTGTTGTTGGGA      |
| IGF1-R      | GCCTCCTTAGATCACAGCTCC     |
| INS-F       | GCAGCCTTTGTGAACCAACAC     |
| INS-R       | CCCCGCACACTAGGTAGAGA      |
| IRGM-F      | CCTCACCTCCTACTGAGCTG      |
| IRGM-R      | GTTTTGGCAAGCATCACATGATT   |
| LAMP1-F     | CACGAGAAATGCAACACGTTAC    |
| LAMP1-R     | GGGTGCCACTAACACATCTGTAT   |
| MAP1LC3A-F  | AACATGAGCGAGTTGGTCAAG     |
| MAP1LC3A-R  | GCTCGTAGATGTCGCGGAT       |
| MAP1LC3B-F  | AAGGCGCTTACAGCTCAATG      |
| MAP1LC3B-R  | CTGGGAGGCATAGACCATGT      |
| MAPK14-F    | CTGTTGGACGTTTTTACACCTGC   |
| MAPK14-R    | AGACCTCGGAGAAATTTGGTAGA   |
| MAPK8-F     | TGTTGGAATCAAGCACCTTC      |
| MAPK8-R     | AGGCGTCATCATAAACTCGTTC    |
| MTOR-F      | TCCGAGAGATGATCAAGAGG      |
| MTOR-R      | CACCTTCCACTCCTATGAGGC     |
| NFKB1-F     | GAAGCAGCAATGACAGAGGC      |
| NFKB1-R     | GCTTGGCGGATTAGCTCTTTT     |
| NPC1-F      | GTCTCCGAGTACACTCCCATC     |
| NPC1-R      | CGCAGTAATGAAGACCAGCGA     |
| PIK3C3-F    | GTCTGGCCTAATGTAGAAGCAG    |
| PIK3C3-R    | GGCAAGACGGCTCATCTGAT      |
| PIK3CG-F    | GGCGAAAACGCCCATCAAAA      |
| PIK3CG-R    | GACTCCCGTGCAGTCAATCC      |
| PIK3R4-F    | GCTCTTAGGCGAGTATGTGCG     |
| PIK3R4-R    | GATGTCCCAGTACGCAACTCC     |
| PRKAA1-F    | GGCACGCCATACCTTGAT        |
| PRKAA1-R    | TCTTCTCTGTCACAGCAAATAA    |
| PTEN-F      | TTTGAAGACCATAACCACCAC     |
| PTEN-R      | ATTACACCAGTTCGTCCTTTT     |
| RAB24-F     | TCTGGGTGAAGGAACTGCG       |
| RAB24-R     | ACTGACGTAATCCTCTGCCAC     |
| RB1-F       | CACCTTTGTAACGCCTTCTGT     |
| RB1-R       | CACGTTTGAATGCTCCTGAACA    |
| RGS19-F     | GGCGCAGTCTTTTGAACAGC      |
| RGS19-R     | GCCTTCTCGTCTACCACATGC     |
| RPS6KB1-F   | AGAACTCTGGCTCGAAAGGT      |
| RPS6KB1-R   | CGACAGGTGTCTGACGTGTAA     |
| SNCA-F      | AAGAGGGTGTCTCTATGAGGC     |
| SNCA-R      | GCTCCTCCAACATTTGTCACTT    |
| SQSTM1-F    | GACTACGACTTGTGTAGCGTC     |
| SQSTM1-R    | AGTGTCCGTGTTTACCTTCC      |
| TGFB1-F     | CAATTCCTGGCGATACCTCAG     |
| TGFB1-R     | GCACAACCTCCGGTGACATCAA    |
| TGM2-F      | CGTGACCAACTACAACCTCGG     |
| TGM2-R      | CATCCACGACTCCACCCAG       |
| TMEM74-F    | AAATAACAGCGGAACGGAAAGT    |
| TMEM74-R    | CTTGGGACCCTCATTTTGGATT    |
| TNF-F       | GAGGCCAAGCCCTGGTATG       |
| TNF-R       | CGGGCCGATTGATCTCAGC       |
| TNFSF10-F   | TGCGTGTGATCGTGTCTTCC      |
| TNFSF10-R   | GCTCGTTGGTAAAGTACACGTA    |
| ULK1-F      | CCAGAGCAACATGATGGCG       |
| ULK1-R      | CCTTCCCGTGTAGTGCTG        |
| ULK2-F      | GTGGTATTCGCATCAAAATAGCG   |
| ULK2-R      | CACAAGTACAGCCTTAGCATATA   |
| UVRAG-F     | CTTGGGTACAGCAGATTATGC     |
| UVRAG-R     | CATCGTAAAGAAATTCGAAACACAG |
| WIPI1-F     | AACAGGTCTATGTCTCTCTCT     |
| WIPI1-R     | CTCATGGGCAGCAATAGTGC      |
| bcl2-F      | GGTGGGTGCATGTGTGG         |
| bcl2-R      | CGGTTTCAAGTACTCAGTCACTC   |
| TP53-F      | GAGGTTGGCTCTGACTGTACC     |
| TP53-R      | TCCGTCACAGTAGATTACCAC     |

**Table S2** The expression profiles of 84 genes via autophagy RT2 Profiler™ PCR Array in H358-IRR and A549-IRR cells

| Gene name        | H358R-siNC | H358R-sicav1 | Foldchange | Gene name        | A549R-siNC | A549R-sicav1 | Foldchange |
|------------------|------------|--------------|------------|------------------|------------|--------------|------------|
| <i>IGF1</i>      | 0.6983     | 1.5453       | 2.2129     | <i>GAA</i>       | 0.3839     | 2.4228       | 6.3104     |
| <i>CASP8</i>     | 0.8044     | 1.6487       | 2.0497     | <i>CDKN2A</i>    | 0.2858     | 1.4915       | 5.219      |
| <i>CTSD</i>      | 0.551      | 0.9734       | 1.7666     | <i>IFNG</i>      | 0.4703     | 1.6279       | 3.4613     |
| <i>SQSTM1</i>    | 0.2858     | 0.4954       | 1.7336     | <i>IGF1</i>      | 0.6133     | 1.2875       | 2.0994     |
| <i>GABARAPL1</i> | 1          | 1.5294       | 1.5294     | <i>Tp53</i>      | 0.9446     | 1.7918       | 1.8968     |
| <i>ATG9B</i>     | 0.4307     | 0.6575       | 1.5266     | <i>LAMP1</i>     | 0.8471     | 1.5695       | 1.8528     |
| <i>HDAC6</i>     | 1          | 1.4852       | 1.4852     | <i>TGM2</i>      | 0.2416     | 0.4354       | 1.8022     |
| <i>BCL2L1</i>    | 0.5207     | 0.7624       | 1.4644     | <i>tnfsf10</i>   | 0.9945     | 1.7918       | 1.8018     |
| <i>CASP3</i>     | 1          | 1.4201       | 1.4201     | <i>FAS</i>       | 1.3471     | 2.4228       | 1.7985     |
| <i>MAP1LC3A</i>  | 0.0888     | 0.1245       | 1.4024     | <i>TGFB1</i>     | 1.0247     | 1.7918       | 1.7486     |
| <i>HSP90AA1</i>  | 0.8754     | 1.2158       | 1.3889     | <i>GABARAPL1</i> | 0.8727     | 1.503        | 1.7221     |
| <i>CLN3</i>      | 0.7175     | 0.963        | 1.3421     | <i>PIK3C3</i>    | 0.3255     | 0.5546       | 1.7036     |
| <i>IFNG</i>      | 1          | 1.3018       | 1.3018     | <i>SNCA</i>      | 0.009      | 0.015        | 1.6734     |
| <i>ATG4A</i>     | 1          | 1.283        | 1.283      | <i>HGS</i>       | 0.9768     | 1.6245       | 1.6631     |
| <i>MAPK14</i>    | 1          | 1.2771       | 1.2771     | <i>BID</i>       | 1.1697     | 1.9193       | 1.6409     |
| <i>CXCR4</i>     | 0.3389     | 0.4229       | 1.248      | <i>HTT</i>       | 0.7118     | 1.1225       | 1.577      |
| <i>EIF2AK3</i>   | 1          | 1.2359       | 1.2359     | <i>ATG10</i>     | 0.8286     | 1.2813       | 1.5463     |
| <i>rb1</i>       | 1          | 1.2285       | 1.2285     | <i>MAPK14</i>    | 0.8386     | 1.2941       | 1.5431     |
| <i>GABARAPL2</i> | 0.8704     | 1.041        | 1.196      | <i>RGS19</i>     | 1.1394     | 1.6973       | 1.4896     |
| <i>GAA</i>       | 0.153      | 0.1827       | 1.1943     | <i>ATG4A</i>     | 1.1794     | 1.7491       | 1.483      |
| <i>BAD</i>       | 0.7227     | 0.861        | 1.1915     | <i>MAP1LC3A</i>  | 1.4372     | 2.0599       | 1.4333     |
| <i>DRAM1</i>     | 0.7594     | 0.9022       | 1.1881     | <i>DRAM1</i>     | 1.6987     | 2.4228       | 1.4263     |
| <i>CTSB</i>      | 0.5014     | 0.5222       | 1.0415     | <i>BCL2L1</i>    | 1.3625     | 1.9193       | 1.4087     |
| <i>MTOR</i>      | 1          | 1.0342       | 1.0342     | <i>ATG5</i>      | 1.0312     | 1.4508       | 1.4069     |
| <i>BAX</i>       | 1          | 0.9878       | 0.9878     | <i>MTOR</i>      | 0.9046     | 1.2663       | 1.3998     |
| <i>MAP1LC3B</i>  | 1          | 0.9807       | 0.9807     | <i>ulk1</i>      | 1.0789     | 1.5038       | 1.3939     |
| <i>APP</i>       | 1          | 0.9635       | 0.9635     | <i>BNIP3</i>     | 0.3849     | 0.5344       | 1.3883     |
| <i>HDAC1</i>     | 0.8404     | 0.8096       | 0.9634     | <i>FADD</i>      | 1.1882     | 1.6052       | 1.3509     |
| <i>FADD</i>      | 1          | 0.9615       | 0.9615     | <i>CTSB</i>      | 1.8356     | 2.4228       | 1.3199     |
| <i>FAS</i>       | 0.578      | 0.5435       | 0.9402     | <i>APP</i>       | 1.2544     | 1.5981       | 1.2739     |
| <i>ATG12</i>     | 1          | 0.934        | 0.934      | <i>GABARAPL2</i> | 1.9313     | 2.4228       | 1.2545     |
| <i>ulk1</i>      | 1.0696     | 0.9792       | 0.9155     | <i>ATG4C</i>     | 0.6484     | 0.8116       | 1.2517     |
| <i>ATG10</i>     | 1          | 0.9053       | 0.9053     | <i>ATG4B</i>     | 0.4759     | 0.589        | 1.2377     |
| <i>MAPK8</i>     | 1          | 0.8975       | 0.8975     | <i>RPS6KB1</i>   | 1.1394     | 1.395        | 1.2243     |
| <i>CTSS</i>      | 0.0357     | 0.0317       | 0.8881     | <i>uvrag</i>     | 1.1394     | 1.378        | 1.2094     |
| <i>HTT</i>       | 1          | 0.8858       | 0.8858     | <i>HSP90AA1</i>  | 1.4372     | 1.7367       | 1.2085     |
| <i>ATG5</i>      | 1          | 0.8769       | 0.8769     | <i>ATG16L1</i>   | 1.0045     | 1.2131       | 1.2076     |
| <i>PRKAA1</i>    | 1          | 0.8687       | 0.8687     | <i>PRKAA1</i>    | 1.2067     | 1.4002       | 1.1603     |
| <i>BNIP3</i>     | 1          | 0.8652       | 0.8652     | <i>CTSS</i>      | 1.9933     | 2.306        | 1.1569     |
| <i>PIK3C3</i>    | 1          | 0.8624       | 0.8624     | <i>ATG12</i>     | 1.1872     | 1.3501       | 1.1372     |
| <i>INS</i>       | 0          | 0            | 0.8371     | <i>AMBRA1</i>    | 1.0988     | 1.2467       | 1.1346     |
| <i>NPC1</i>      | 1          | 0.8263       | 0.8263     | <i>CASP8</i>     | 0.422      | 0.4722       | 1.1191     |
| <i>HGS</i>       | 1          | 0.8142       | 0.8142     | <i>PIK3R4</i>    | 0.8909     | 0.9597       | 1.0772     |
| <i>ATG4C</i>     | 1          | 0.8135       | 0.8135     | <i>BAX</i>       | 1.4835     | 1.5929       | 1.0738     |
| <i>uvrag</i>     | 0.5926     | 0.4726       | 0.7974     | <i>MAPK8</i>     | 1.2524     | 1.3168       | 1.0514     |
| <i>wIP1</i>      | 0.3429     | 0.2707       | 0.7894     | <i>ATG16L2</i>   | 1.6052     | 1.6678       | 1.039      |
| <i>RAB24</i>     | 1          | 0.7831       | 0.7831     | <i>RAB24</i>     | 0.4017     | 0.4147       | 1.0323     |
| <i>ulk2</i>      | 1.0696     | 0.8279       | 0.774      | <i>HDAC6</i>     | 1.8965     | 1.9245       | 1.0147     |
| <i>ATG4B</i>     | 1          | 0.7719       | 0.7719     | <i>PTEN</i>      | 1.4372     | 1.4301       | 0.9951     |
| <i>RPS6KB1</i>   | 0.9358     | 0.7198       | 0.7692     | <i>EIF2AK3</i>   | 1.0597     | 1.0521       | 0.9928     |
| <i>EIF4G1</i>    | 1          | 0.7685       | 0.7685     | <i>ATG3</i>      | 1.6052     | 1.5929       | 0.9923     |
| <i>PTEN</i>      | 0.9577     | 0.7154       | 0.747      | <i>SQSTM1</i>    | 1.1394     | 1.1286       | 0.9905     |
| <i>BAK1</i>      | 1          | 0.7396       | 0.7396     | <i>CTSD</i>      | 1.9933     | 1.9268       | 0.9666     |
| <i>PIK3R4</i>    | 1          | 0.7254       | 0.7254     | <i>MAP1LC3B</i>  | 0.9613     | 0.9268       | 0.9641     |
| <i>ATG9A</i>     | 1          | 0.7232       | 0.7232     | <i>bcl2</i>      | 0.0534     | 0.0505       | 0.9458     |
| <i>ATG4D</i>     | 1          | 0.7039       | 0.7039     | <i>ATG9A</i>     | 0.5719     | 0.5381       | 0.941      |
| <i>AMBRA1</i>    | 1          | 0.6932       | 0.6932     | <i>ATG7</i>      | 1.6052     | 1.4953       | 0.9315     |
| <i>NFKB1</i>     | 1          | 0.6692       | 0.6692     | <i>ulk2</i>      | 1.0374     | 0.9658       | 0.931      |
| <i>ATG3</i>      | 0.9163     | 0.6125       | 0.6684     | <i>NPC1</i>      | 0.7955     | 0.737        | 0.9264     |
| <i>ATG7</i>      | 0.8802     | 0.5876       | 0.6676     | <i>BAK1</i>      | 0.957      | 0.8862       | 0.926      |
| <i>tnf</i>       | 0.4778     | 0.3141       | 0.6574     | <i>wIP1</i>      | 1.1394     | 1.0203       | 0.8955     |
| <i>TGM2</i>      | 1.0696     | 0.7005       | 0.655      | <i>HDAC1</i>     | 1.9933     | 1.7508       | 0.8784     |
| <i>BID</i>       | 0.458      | 0.2856       | 0.6236     | <i>rb1</i>       | 0.9387     | 0.8225       | 0.8762     |
| <i>ATG16L2</i>   | 0.9889     | 0.5985       | 0.6052     | <i>DRAM2</i>     | 1.9933     | 1.7366       | 0.8712     |
| <i>TGFB1</i>     | 0.5944     | 0.3526       | 0.5932     | <i>NFKB1</i>     | 1.3553     | 1.1671       | 0.8612     |
| <i>RGS19</i>     | 0.6267     | 0.3623       | 0.5781     | <i>BECN1</i>     | 1.3699     | 1.1671       | 0.8519     |
| <i>ATG16L1</i>   | 1          | 0.5675       | 0.5675     | <i>CXCR4</i>     | 1.9933     | 1.6413       | 0.8234     |
| <i>BECN1</i>     | 1          | 0.5667       | 0.5667     | <i>CLN3</i>      | 1.9933     | 1.4943       | 0.7497     |
| <i>DRAM2</i>     | 0.4974     | 0.278        | 0.559      | <i>GABARAP</i>   | 2.3098     | 1.7238       | 0.7463     |
| <i>AKT1</i>      | 1          | 0.533        | 0.533      | <i>AKT1</i>      | 1.1044     | 0.7944       | 0.7193     |
| <i>HSPA8</i>     | 1          | 0.5283       | 0.5283     | <i>DAPK1</i>     | 1.9933     | 1.4317       | 0.7183     |
| <i>DAPK1</i>     | 0.1014     | 0.0495       | 0.4883     | <i>HSPA8</i>     | 0.9573     | 0.6844       | 0.7149     |
| <i>bcl2</i>      | 1.0696     | 0.5189       | 0.4852     | <i>EIF4G1</i>    | 1.2991     | 0.9053       | 0.6969     |
| <i>GABARAP</i>   | 1          | 0.4851       | 0.4851     | <i>ATG4D</i>     | 1.0755     | 0.7241       | 0.6733     |
| <i>TP53</i>      | 0.9615     | 0.3957       | 0.4116     | <i>CASP3</i>     | 1.7132     | 1.027        | 0.5995     |
| <i>CDKN2A</i>    | 0.8455     | 0.3124       | 0.3695     | <i>CDKN1B</i>    | 1.9933     | 1.0897       | 0.5467     |
| <i>SNCA</i>      | 1.0696     | 0.3748       | 0.3504     | <i>TMEM74</i>    | 0.1052     | 0.0566       | 0.538      |
| <i>TMEM74</i>    | 1.0696     | 0.3716       | 0.3474     | <i>BAD</i>       | 1.6052     | 0.7489       | 0.4665     |
| <i>tnfsf10</i>   | 0.0519     | 0.0156       | 0.3002     | <i>ATG9B</i>     | 2.991      | 1.3867       | 0.4636     |
| <i>LAMP1</i>     | 1          | 0.2301       | 0.2301     | <i>TNF</i>       | 2.991      | 1.2547       | 0.4195     |
| <i>IRGM</i>      | 0.9146     | 0.1409       | 0.154      | <i>IRGM</i>      | 2.991      | 0.0741       | 0.0248     |
| <i>CDKN1B</i>    |            |              | N/A        | <i>ESR1</i>      |            |              | N/A        |
| <i>ESR1</i>      |            |              | N/A        | <i>PIK3CG</i>    |            |              | N/A        |
| <i>PIK3CG</i>    |            |              | N/A        | <i>INS</i>       |            |              | N/A        |

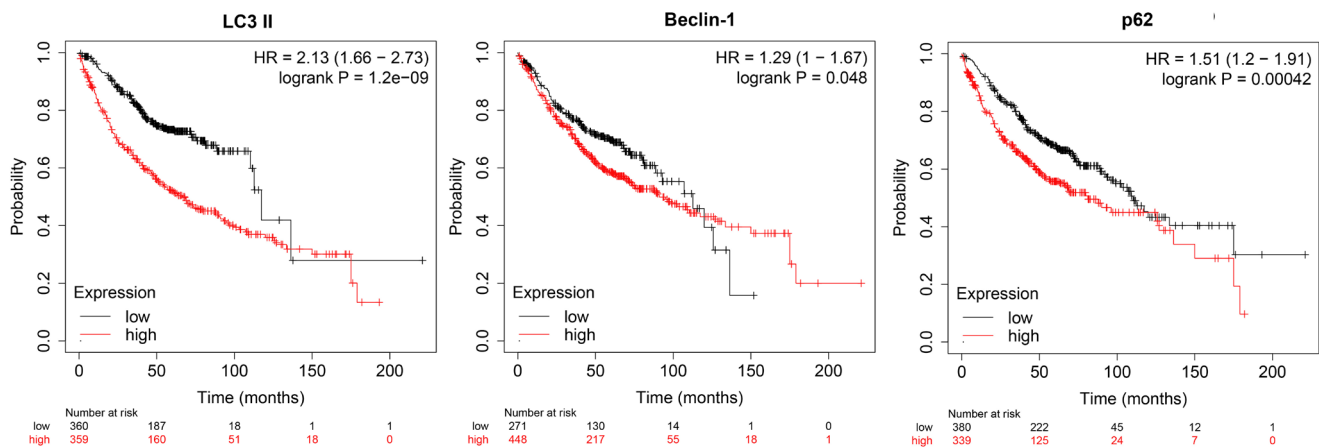

**Figure S1** The overall survival analysis based on expression of LC3 II, Beclin-1 and p62. LC3 II, Microtubule associated protein 1 light chain 3 II; p62, Sequestosome 1.
